# Supplementary material
Source: Springer Nature journal article supplement (https://www.springermedizin.de/resource/supplementary/12911_2011_473_MOESM2_ESM.pdf/9526040)

Organizational  
Perspectives

Personal  
Perspectives

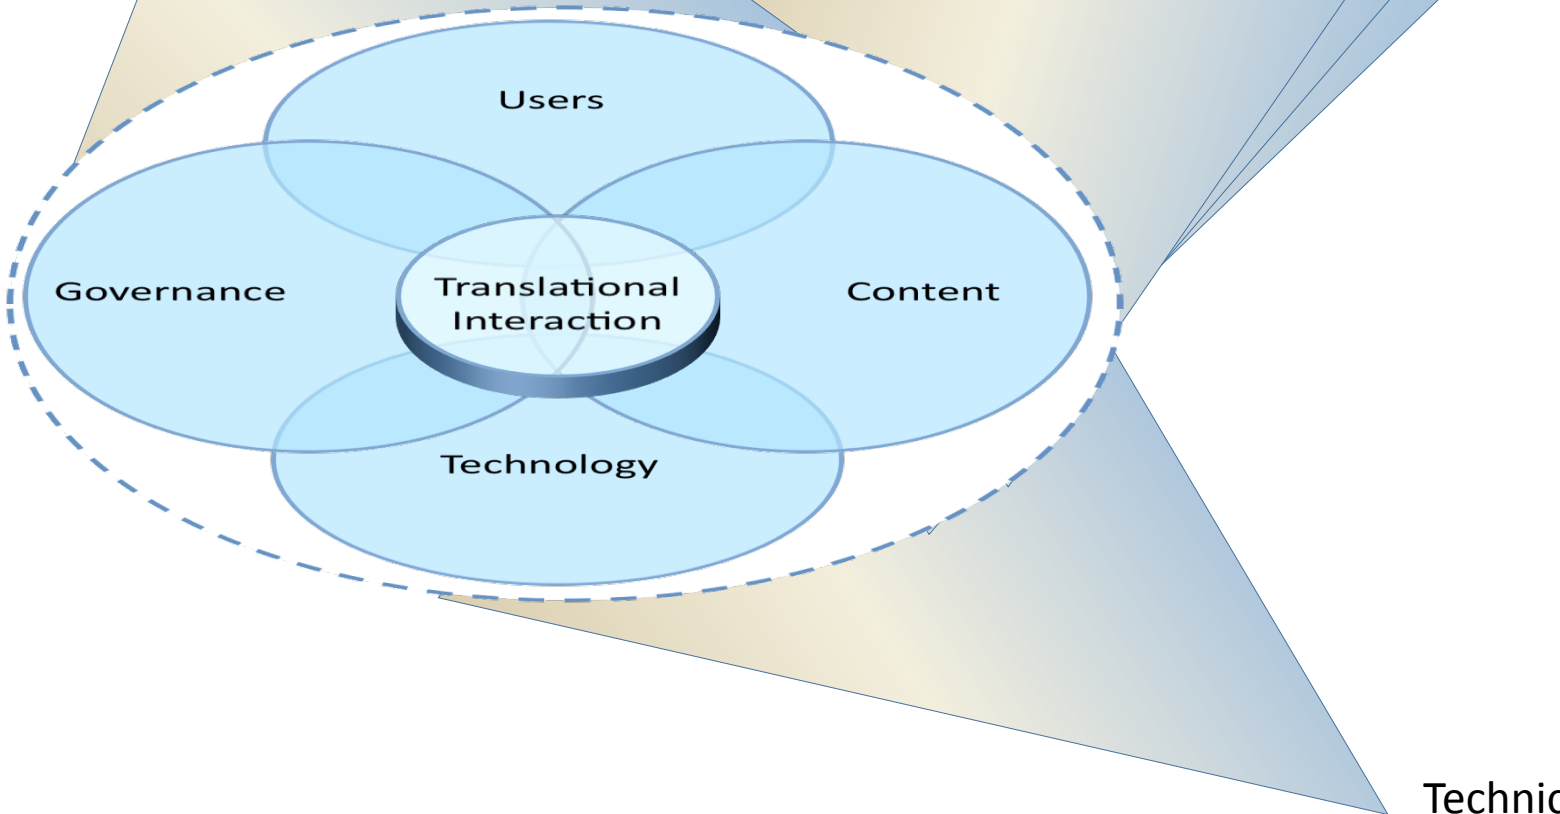

Technical  
Perspective

Supplement: MOESM2 [file 9526040]
